# Supplementary material for: Thickness dependence of surface energy and contact angle of water droplets on ultrathin MoS2 films
Source: Royal Society of Chemistry journal article supplement (doi:10.1039/c6cp00036c), 2016-01-01
Supplement: c6cp00036c1.pdf [file c6cp00036c1.pdf]

### Supporting Information:

Table 1 Optimized cell parameters ( $a$ ,  $c$ ) and calculated total energies ( $E_{\text{tot}}$ ) of 2H and 3R polytypes of MoS<sub>2</sub> cell, and  $d_{\text{Mo-S}}$  is bond length.

| Phase               | Method | $a$ (Å) | $c$ (Å) | $d_{\text{Mo-S}}$ (Å) | $E_{\text{tot}}$ (eV/MoS <sub>2</sub> ) |
|---------------------|--------|---------|---------|-----------------------|-----------------------------------------|
| 2H-MoS <sub>2</sub> | PBE    | 3.18    | 14.74   | 2.41                  | -21.80                                  |
|                     | DFT-D2 | 3.19    | 12.36   | 2.41                  | -22.55                                  |
|                     | vdW-DF | 3.22    | 12.67   | 2.44                  | -20.20                                  |
| 3R-MoS <sub>2</sub> | PBE    | 3.19    | 21.17   | 2.41                  | -21.80                                  |
|                     | DFT-D2 | 3.19    | 18.55   | 2.41                  | -22.55                                  |
|                     | vdW-DF | 3.22    | 18.96   | 2.44                  | -20.20                                  |

The optimized lattice constants and atomic structural parameters of these MoS<sub>2</sub> polytypes are presented in Table 1. Our results are in good agreement with previous theoretical results. Using the same vdW-DF method, Rydberg *et al*<sup>31</sup> reported  $a = 3.3$  Å, and  $c = 12.6$  Å for 2H-MoS<sub>2</sub>, which are qualitatively similar to our results ( $a = 3.22$  Å, and  $c = 12.67$  Å). Mortazavi *et al*<sup>32</sup> obtained  $a = 3.19$  Å, and  $c = 18.52$  Å for 3R phase with the DFT-D2 method.
